# Supplementary material
Source: MDPI journal article supplement (https://www.mdpi.com/2312-7481/4/3/39)

# checkCIF/PLATON report

Structure factors have been supplied for datablock(s) FPR867B

THIS REPORT IS FOR GUIDANCE ONLY. IF USED AS PART OF A REVIEW PROCEDURE FOR PUBLICATION, IT SHOULD NOT REPLACE THE EXPERTISE OF AN EXPERIENCED CRYSTALLOGRAPHIC REFEREE.

No syntax errors found.      CIF dictionary      Interpreting this report

## Datablock: FPR867B

---

Bond precision:    C-C = 0.0240 Å

Wavelength=0.71073

Cell:                a=12.2906(17)        b=17.962(3)        c=18.439(3)  
                      alpha=90.015(5)    beta=99.337(5)    gamma=100.196(5)  
Temperature:        150 K

|                | Calculated                        | Reported               |
|----------------|-----------------------------------|------------------------|
| Volume         | 3951.5(11)                        | 3951.7(10)             |
| Space group    | P -1                              | P -1                   |
| Hall group     | -P 1                              | -P 1                   |
| Moiety formula | C64 H26 F36 N4 O12 Yb2, C6<br>H14 | C70 H40 F36 N4 O12 Yb2 |
| Sum formula    | C70 H40 F36 N4 O12 Yb2            | C70 H40 F36 N4 O12 Yb2 |
| Mr             | 2159.14                           | 2159.14                |
| Dx,g cm-3      | 1.815                             | 1.815                  |
| Z              | 2                                 | 2                      |
| Mu (mm-1)      | 2.498                             | 2.498                  |
| F000           | 2096.0                            | 2096.0                 |
| F000'          | 2096.22                           |                        |
| h,k,lmax       | 15,23,23                          | 15,23,23               |
| Nref           | 18103                             | 17903                  |
| Tmin,Tmax      | 0.507,0.638                       | 0.557,0.638            |
| Tmin'          | 0.456                             |                        |

Correction method= # Reported T Limits: Tmin=0.557 Tmax=0.638

AbsCorr = MULTI-SCAN

Data completeness= 0.989

Theta(max)= 27.485

R(reflections)= 0.1070( 14464)

wR2(reflections)= 0.2787( 17903)

S = 1.076

Npar= 1025

---

The following ALERTS were generated. Each ALERT has the format

**test-name\_ALERT\_alert-type\_alert-level.**

Click on the hyperlinks for more details of the test.

---

### Alert level A

|                   |                                        |       |          |            |
|-------------------|----------------------------------------|-------|----------|------------|
| PLAT971_ALERT_2_A | Check Calcd Resid. Dens.               | 0.93A | From Yb2 | 10.81 eA-3 |
| PLAT971_ALERT_2_A | Check Calcd Resid. Dens.               | 0.87A | From Yb1 | 4.34 eA-3  |
| PLAT972_ALERT_2_A | Check Calcd Resid. Dens.               | 0.68A | From Yb2 | -3.84 eA-3 |
| PLAT973_ALERT_2_A | Check Calcd Positive Resid. Density on |       | Yb1      | 2.79 eA-3  |

---

### Alert level B

|                   |                                                  |              |
|-------------------|--------------------------------------------------|--------------|
| PLAT097_ALERT_2_B | Large Reported Max. (Positive) Residual Density  | 11.27 eA-3   |
| PLAT213_ALERT_2_B | Atom F35 has ADP max/min Ratio .....             | 4.9 prolat   |
| PLAT230_ALERT_2_B | Hirshfeld Test Diff for F25 --C55 .              | 7.8 s.u.     |
| PLAT230_ALERT_2_B | Hirshfeld Test Diff for F27 --C55 .              | 16.2 s.u.    |
| PLAT342_ALERT_3_B | Low Bond Precision on C-C Bonds .....            | 0.02402 Ang. |
| PLAT434_ALERT_2_B | Short Inter HL..HL Contact F25 ..F24B            | 2.35 Ang.    |
| PLAT910_ALERT_3_B | Missing # of FCF Reflection(s) Below Theta(Min). | 24 Note      |
| PLAT934_ALERT_3_B | Number of (Iobs-Icalc)/SigmaW > 10 Outliers .... | 2 Check      |
| PLAT939_ALERT_3_B | Large Value of Not (SHELXL) Weight Optimized S . | 148.49 Check |
| PLAT971_ALERT_2_B | Check Calcd Resid. Dens. 1.37A From O3           | 2.83 eA-3    |
| PLAT972_ALERT_2_B | Check Calcd Resid. Dens. 0.60A From Yb2          | -3.34 eA-3   |
| PLAT972_ALERT_2_B | Check Calcd Resid. Dens. 1.02A From Yb1          | -3.10 eA-3   |
| PLAT972_ALERT_2_B | Check Calcd Resid. Dens. 2.00A From F15          | -2.94 eA-3   |

---

### Alert level C

DIFMX02\_ALERT\_1\_C The maximum difference density is > 0.1\*ZMAX\*0.75

The relevant atom site should be identified.

|                   |                                                  |             |
|-------------------|--------------------------------------------------|-------------|
| PLAT082_ALERT_2_C | High R1 Value .....                              | 0.11 Report |
| PLAT084_ALERT_3_C | High wR2 Value (i.e. > 0.25) .....               | 0.28 Report |
| PLAT094_ALERT_2_C | Ratio of Maximum / Minimum Residual Density .... | 2.80 Report |
| PLAT213_ALERT_2_C | Atom F7 has ADP max/min Ratio .....              | 3.1 prolat  |
| PLAT213_ALERT_2_C | Atom F17 has ADP max/min Ratio .....             | 3.1 prolat  |
| PLAT213_ALERT_2_C | Atom F19 has ADP max/min Ratio .....             | 3.7 prolat  |
| PLAT213_ALERT_2_C | Atom F31 has ADP max/min Ratio .....             | 3.8 prolat  |
| PLAT220_ALERT_2_C | Non-Solvent Resd 1 C Ueq(max)/Ueq(min) Range     | 3.7 Ratio   |
| PLAT220_ALERT_2_C | Non-Solvent Resd 1 F Ueq(max)/Ueq(min) Range     | 4.3 Ratio   |
| PLAT230_ALERT_2_C | Hirshfeld Test Diff for F28 --C59 .              | 5.2 s.u.    |
| PLAT234_ALERT_4_C | Large Hirshfeld Difference F22 --C54             | 0.21 Ang.   |
| PLAT234_ALERT_4_C | Large Hirshfeld Difference F26 --C55             | 0.25 Ang.   |
| PLAT234_ALERT_4_C | Large Hirshfeld Difference F34 --C64             | 0.22 Ang.   |
| PLAT234_ALERT_4_C | Large Hirshfeld Difference F22B --C54            | 0.23 Ang.   |
| PLAT234_ALERT_4_C | Large Hirshfeld Difference F24B --C54            | 0.25 Ang.   |
| PLAT241_ALERT_2_C | High 'MainMol' Ueq as Compared to Neighbors of   | C62 Check   |
| PLAT250_ALERT_2_C | Large U3/U1 Ratio for Average U(i,j) Tensor .... | 3.0 Note    |
| PLAT360_ALERT_2_C | Short C(sp3)-C(sp3) Bond C65 - C66 .             | 1.42 Ang.   |
| PLAT360_ALERT_2_C | Short C(sp3)-C(sp3) Bond C67 - C68 .             | 1.43 Ang.   |
| PLAT360_ALERT_2_C | Short C(sp3)-C(sp3) Bond C68 - C69 .             | 1.43 Ang.   |
| PLAT906_ALERT_3_C | Large K Value in the Analysis of Variance .....  | 4.713 Check |
| PLAT911_ALERT_3_C | Missing FCF Refl Between Thmin & STh/L= 0.600    | 158 Report  |
| PLAT918_ALERT_3_C | Reflection(s) with I(obs) much Smaller I(calc) . | 3 Check     |
| PLAT971_ALERT_2_C | Check Calcd Resid. Dens. 2.11A From F14          | 2.28 eA-3   |
| PLAT971_ALERT_2_C | Check Calcd Resid. Dens. 1.73A From F2           | 2.17 eA-3   |
| PLAT971_ALERT_2_C | Check Calcd Resid. Dens. 0.90A From Yb2          | 2.12 eA-3   |
| PLAT971_ALERT_2_C | Check Calcd Resid. Dens. 1.36A From Yb1          | 2.08 eA-3   |
| PLAT971_ALERT_2_C | Check Calcd Resid. Dens. 1.05A From Yb1          | 1.91 eA-3   |
| PLAT971_ALERT_2_C | Check Calcd Resid. Dens. 1.52A From F25          | 1.70 eA-3   |
| PLAT971_ALERT_2_C | Check Calcd Resid. Dens. 2.12A From F15          | 1.64 eA-3   |

|                   |                                                  |       |          |            |
|-------------------|--------------------------------------------------|-------|----------|------------|
| PLAT971_ALERT_2_C | Check Calcd Resid. Dens.                         | 0.07A | From F26 | 1.59 eA-3  |
| PLAT972_ALERT_2_C | Check Calcd Resid. Dens.                         | 1.21A | From O6  | -2.28 eA-3 |
| PLAT972_ALERT_2_C | Check Calcd Resid. Dens.                         | 0.08A | From C55 | -2.09 eA-3 |
| PLAT972_ALERT_2_C | Check Calcd Resid. Dens.                         | 0.91A | From Yb1 | -2.09 eA-3 |
| PLAT972_ALERT_2_C | Check Calcd Resid. Dens.                         | 0.81A | From Yb1 | -1.92 eA-3 |
| PLAT972_ALERT_2_C | Check Calcd Resid. Dens.                         | 0.89A | From Yb1 | -1.82 eA-3 |
| PLAT972_ALERT_2_C | Check Calcd Resid. Dens.                         | 1.04A | From Yb1 | -1.78 eA-3 |
| PLAT972_ALERT_2_C | Check Calcd Resid. Dens.                         | 1.33A | From O11 | -1.69 eA-3 |
| PLAT972_ALERT_2_C | Check Calcd Resid. Dens.                         | 0.88A | From Yb1 | -1.65 eA-3 |
| PLAT972_ALERT_2_C | Check Calcd Resid. Dens.                         | 1.00A | From Yb1 | -1.64 eA-3 |
| PLAT972_ALERT_2_C | Check Calcd Resid. Dens.                         | 1.19A | From O11 | -1.51 eA-3 |
| PLAT977_ALERT_2_C | Check Negative Difference Density on H26         |       |          | -0.34 eA-3 |
| PLAT977_ALERT_2_C | Check Negative Difference Density on H70A        |       |          | -0.45 eA-3 |
| PLAT978_ALERT_2_C | Number C-C Bonds with Positive Residual Density. |       |          | 0 Info     |

## ● Alert level G

|                   |                                                  |   |              |
|-------------------|--------------------------------------------------|---|--------------|
| PLAT002_ALERT_2_G | Number of Distance or Angle Restraints on AtSite |   | 11 Note      |
| PLAT019_ALERT_1_G | _diffn_measured_fraction_theta_full/*_max < 1.0  |   | 0.998 Report |
| PLAT042_ALERT_1_G | Calc. and Reported MoietyFormula Strings Differ  |   | Please Check |
| PLAT083_ALERT_2_G | SHELXL Second Parameter in WGHT Unusually Large  |   | 116.02 Why ? |
| PLAT154_ALERT_1_G | The s.u.'s on the Cell Angles are Equal ..(Note) |   | 0.005 Degree |
| PLAT171_ALERT_4_G | The CIF-Embedded .res File Contains EADP Records |   | 5 Report     |
| PLAT172_ALERT_4_G | The CIF-Embedded .res File Contains DFIX Records |   | 5 Report     |
| PLAT230_ALERT_2_G | Hirshfeld Test Diff for F23 --C54                | . | 6.0 s.u.     |
| PLAT230_ALERT_2_G | Hirshfeld Test Diff for F24 --C54                | . | 5.5 s.u.     |
| PLAT230_ALERT_2_G | Hirshfeld Test Diff for F23B --C54               | . | 6.0 s.u.     |
| PLAT242_ALERT_2_G | Low 'MainMol' Ueq as Compared to Neighbors of    |   | C35 Check    |
| PLAT242_ALERT_2_G | Low 'MainMol' Ueq as Compared to Neighbors of    |   | C39 Check    |
| PLAT242_ALERT_2_G | Low 'MainMol' Ueq as Compared to Neighbors of    |   | C40 Check    |
| PLAT242_ALERT_2_G | Low 'MainMol' Ueq as Compared to Neighbors of    |   | C44 Check    |
| PLAT242_ALERT_2_G | Low 'MainMol' Ueq as Compared to Neighbors of    |   | C45 Check    |
| PLAT242_ALERT_2_G | Low 'MainMol' Ueq as Compared to Neighbors of    |   | C49 Check    |
| PLAT242_ALERT_2_G | Low 'MainMol' Ueq as Compared to Neighbors of    |   | C50 Check    |
| PLAT242_ALERT_2_G | Low 'MainMol' Ueq as Compared to Neighbors of    |   | C54 Check    |
| PLAT242_ALERT_2_G | Low 'MainMol' Ueq as Compared to Neighbors of    |   | C55 Check    |
| PLAT242_ALERT_2_G | Low 'MainMol' Ueq as Compared to Neighbors of    |   | C59 Check    |
| PLAT242_ALERT_2_G | Low 'MainMol' Ueq as Compared to Neighbors of    |   | C60 Check    |
| PLAT242_ALERT_2_G | Low 'MainMol' Ueq as Compared to Neighbors of    |   | C64 Check    |
| PLAT301_ALERT_3_G | Main Residue Disorder .....(Resd 1 )             |   | 3% Note      |
| PLAT432_ALERT_2_G | Short Inter X...Y Contact C21 ..C70              |   | 3.18 Ang.    |
| PLAT432_ALERT_2_G | Short Inter X...Y Contact C26 ..C26              |   | 3.18 Ang.    |
| PLAT434_ALERT_2_G | Short Inter HL..HL Contact F25 ..F35             |   | 2.80 Ang.    |
| PLAT434_ALERT_2_G | Short Inter HL..HL Contact F29 ..F29             |   | 2.63 Ang.    |
| PLAT794_ALERT_5_G | Tentative Bond Valency for Yb1 (III)             | . | 3.32 Info    |
| PLAT794_ALERT_5_G | Tentative Bond Valency for Yb2 (III)             | . | 3.39 Info    |
| PLAT860_ALERT_3_G | Number of Least-Squares Restraints .....         |   | 12 Note      |
| PLAT912_ALERT_4_G | Missing # of FCF Reflections Above STh/L= 0.600  |   | 18 Note      |

4 **ALERT level A** = Most likely a serious problem - resolve or explain  
 13 **ALERT level B** = A potentially serious problem, consider carefully  
 45 **ALERT level C** = Check. Ensure it is not caused by an omission or oversight  
 31 **ALERT level G** = General information/check it is not something unexpected

4 ALERT type 1 CIF construction/syntax error, inconsistent or missing data  
 69 ALERT type 2 Indicator that the structure model may be wrong or deficient  
 10 ALERT type 3 Indicator that the structure quality may be low  
 8 ALERT type 4 Improvement, methodology, query or suggestion  
 2 ALERT type 5 Informative message, check

It is advisable to attempt to resolve as many as possible of the alerts in all categories. Often the minor alerts point to easily fixed oversights, errors and omissions in your CIF or refinement strategy, so attention to these fine details can be worthwhile. In order to resolve some of the more serious problems it may be necessary to carry out additional measurements or structure refinements. However, the purpose of your study may justify the reported deviations and the more serious of these should normally be commented upon in the discussion or experimental section of a paper or in the "special\_details" fields of the CIF. checkCIF was carefully designed to identify outliers and unusual parameters, but every test has its limitations and alerts that are not important in a particular case may appear. Conversely, the absence of alerts does not guarantee there are no aspects of the results needing attention. It is up to the individual to critically assess their own results and, if necessary, seek expert advice.

### **Publication of your CIF in IUCr journals**

A basic structural check has been run on your CIF. These basic checks will be run on all CIFs submitted for publication in IUCr journals (*Acta Crystallographica*, *Journal of Applied Crystallography*, *Journal of Synchrotron Radiation*); however, if you intend to submit to *Acta Crystallographica Section C* or *E* or *IUCrData*, you should make sure that full publication checks are run on the final version of your CIF prior to submission.

### **Publication of your CIF in other journals**

Please refer to the *Notes for Authors* of the relevant journal for any special instructions relating to CIF submission.

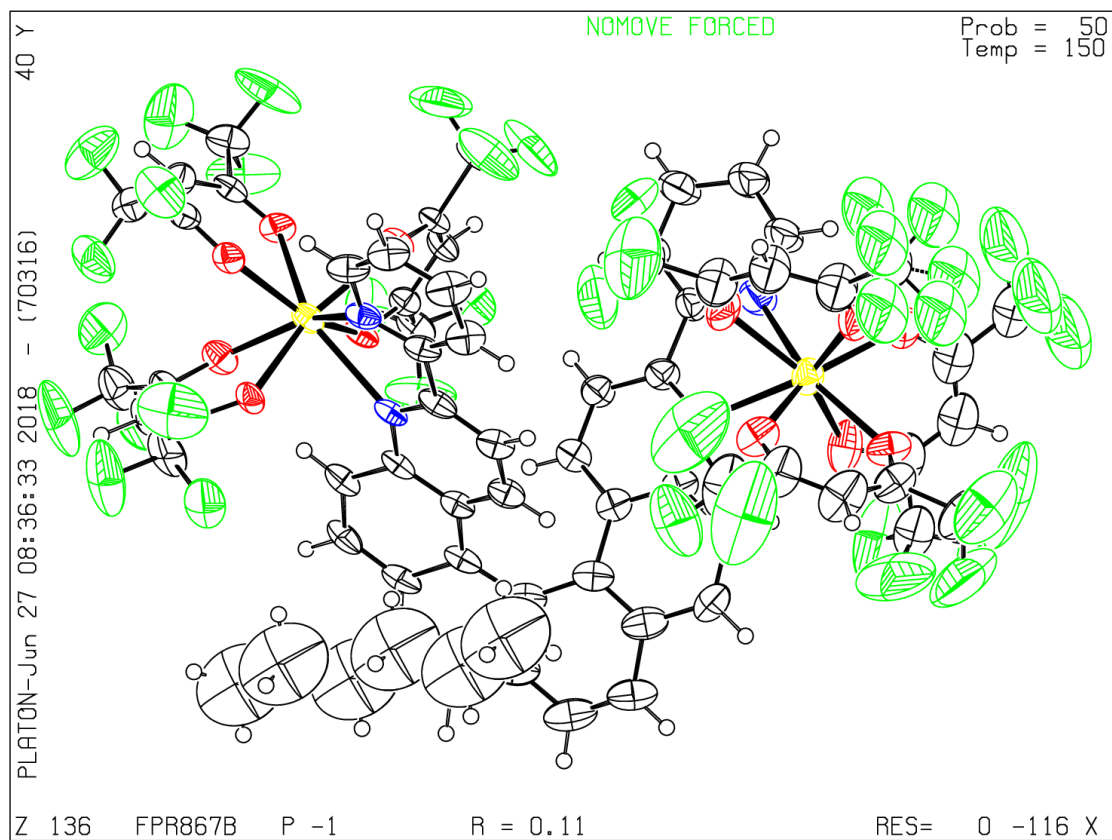

Supplement: s1 [file s1]
