# Supplementary material
Source: MDPI journal article supplement (https://www.mdpi.com/2312-7481/4/3/39)

# checkCIF/PLATON report

Structure factors have been supplied for datablock(s) FPR853

THIS REPORT IS FOR GUIDANCE ONLY. IF USED AS PART OF A REVIEW PROCEDURE FOR PUBLICATION, IT SHOULD NOT REPLACE THE EXPERTISE OF AN EXPERIENCED CRYSTALLOGRAPHIC REFEREE.

No syntax errors found.      CIF dictionary      Interpreting this report

## Datablock: FPR853

---

Bond precision:    C-C = 0.0141 Å

Wavelength=0.71073

Cell:                a=12.2629(16)        b=16.534(2)        c=18.118(2)  
                      alpha=79.414(5)    beta=77.667(5)    gamma=87.190(5)  
Temperature:        150 K

|                | Calculated             | Reported               |
|----------------|------------------------|------------------------|
| Volume         | 3527.5(7)              | 3527.4(8)              |
| Space group    | P -1                   | P -1                   |
| Hall group     | -P 1                   | -P 1                   |
| Moiety formula | C64 H26 Dy2 F36 N4 O12 | C64 H26 Dy2 F36 N4 O12 |
| Sum formula    | C64 H26 Dy2 F36 N4 O12 | C64 H26 Dy2 F36 N4 O12 |
| Mr             | 2051.89                | 2051.89                |
| Dx,g cm-3      | 1.932                  | 1.932                  |
| Z              | 2                      | 2                      |
| Mu (mm-1)      | 2.261                  | 2.261                  |
| F000           | 1980.0                 | 1980.0                 |
| F000'          | 1980.95                |                        |
| h,k,lmax       | 15,21,23               | 15,21,23               |
| Nref           | 16190                  | 15733                  |
| Tmin,Tmax      | 0.587,0.934            | 0.774,0.934            |
| Tmin'          | 0.334                  |                        |

Correction method= # Reported T Limits: Tmin=0.774 Tmax=0.934  
AbsCorr = MULTI-SCAN

Data completeness= 0.972

Theta(max)= 27.485

R(reflections)= 0.0672( 11594)

wR2(reflections)= 0.1818( 15733)

S = 1.063

Npar= 1027

---

The following ALERTS were generated. Each ALERT has the format

**test-name\_ALERT\_alert-type\_alert-level.**

Click on the hyperlinks for more details of the test.

---

### 🔴 Alert level B

|                   |                                                  |                             |      |        |
|-------------------|--------------------------------------------------|-----------------------------|------|--------|
| PLAT213_ALERT_2_B | Atom F12                                         | has ADP max/min Ratio ..... | 4.2  | prolat |
| PLAT213_ALERT_2_B | Atom F13                                         | has ADP max/min Ratio ..... | 4.1  | prolat |
| PLAT213_ALERT_2_B | Atom F14                                         | has ADP max/min Ratio ..... | 4.4  | prolat |
| PLAT213_ALERT_2_B | Atom F30                                         | has ADP max/min Ratio ..... | 4.9  | prolat |
| PLAT213_ALERT_2_B | Atom C54                                         | has ADP max/min Ratio ..... | 4.5  | prolat |
| PLAT220_ALERT_2_B | Non-Solvent Resd 1 C                             | Ueq(max)/Ueq(min) Range     | 6.5  | Ratio  |
| PLAT230_ALERT_2_B | Hirshfeld Test Diff for F16                      | --C49 .                     | 19.9 | s.u.   |
| PLAT230_ALERT_2_B | Hirshfeld Test Diff for F17                      | --C49 .                     | 13.9 | s.u.   |
| PLAT230_ALERT_2_B | Hirshfeld Test Diff for F18                      | --C49 .                     | 12.6 | s.u.   |
| PLAT230_ALERT_2_B | Hirshfeld Test Diff for F27                      | --C55 .                     | 8.8  | s.u.   |
| PLAT230_ALERT_2_B | Hirshfeld Test Diff for F29                      | --C59 .                     | 10.9 | s.u.   |
| PLAT234_ALERT_4_B | Large Hirshfeld Difference F24                   | --C54                       | 0.28 | Ang.   |
| PLAT234_ALERT_4_B | Large Hirshfeld Difference F36                   | --C64                       | 0.26 | Ang.   |
| PLAT910_ALERT_3_B | Missing # of FCF Reflection(s) Below Theta(Min). |                             | 20   | Note   |
| PLAT971_ALERT_2_B | Check Calcd Resid. Dens. 1.18A                   | From F17                    | 2.84 | eA-3   |
| PLAT975_ALERT_2_B | Check Calcd Resid. Dens. 1.09A                   | From O9                     | 1.95 | eA-3   |

---

### 🔴 Alert level C

|                   |                                                  |                             |         |        |
|-------------------|--------------------------------------------------|-----------------------------|---------|--------|
| PLAT029_ALERT_3_C | _diffn_measured_fraction_theta_full              | value Low .                 | 0.976   | Why?   |
| PLAT213_ALERT_2_C | Atom F10                                         | has ADP max/min Ratio ..... | 4.0     | prolat |
| PLAT213_ALERT_2_C | Atom F11                                         | has ADP max/min Ratio ..... | 4.0     | prolat |
| PLAT220_ALERT_2_C | Non-Solvent Resd 1 F                             | Ueq(max)/Ueq(min) Range     | 5.9     | Ratio  |
| PLAT222_ALERT_3_C | Non-Solv. Resd 1 H                               | Uiso(max)/Uiso(min) Range   | 4.2     | Ratio  |
| PLAT230_ALERT_2_C | Hirshfeld Test Diff for O10                      | --C58 .                     | 6.8     | s.u.   |
| PLAT230_ALERT_2_C | Hirshfeld Test Diff for O11                      | --C61 .                     | 6.1     | s.u.   |
| PLAT234_ALERT_4_C | Large Hirshfeld Difference F25                   | --C55                       | 0.20    | Ang.   |
| PLAT234_ALERT_4_C | Large Hirshfeld Difference F31                   | --C60                       | 0.20    | Ang.   |
| PLAT234_ALERT_4_C | Large Hirshfeld Difference F33                   | --C60                       | 0.18    | Ang.   |
| PLAT234_ALERT_4_C | Large Hirshfeld Difference O8                    | --C53                       | 0.19    | Ang.   |
| PLAT234_ALERT_4_C | Large Hirshfeld Difference O9                    | --C56                       | 0.17    | Ang.   |
| PLAT234_ALERT_4_C | Large Hirshfeld Difference O12                   | --C63                       | 0.18    | Ang.   |
| PLAT234_ALERT_4_C | Large Hirshfeld Difference C63                   | --C64                       | 0.19    | Ang.   |
| PLAT241_ALERT_2_C | High 'MainMol' Ueq as Compared to Neighbors of   | C58                         | Check   |        |
| PLAT241_ALERT_2_C | High 'MainMol' Ueq as Compared to Neighbors of   | C61                         | Check   |        |
| PLAT241_ALERT_2_C | High 'MainMol' Ueq as Compared to Neighbors of   | C62                         | Check   |        |
| PLAT242_ALERT_2_C | Low 'MainMol' Ueq as Compared to Neighbors of    | O9                          | Check   |        |
| PLAT242_ALERT_2_C | Low 'MainMol' Ueq as Compared to Neighbors of    | O10                         | Check   |        |
| PLAT342_ALERT_3_C | Low Bond Precision on C-C Bonds .....            |                             | 0.01411 | Ang.   |
| PLAT911_ALERT_3_C | Missing FCF Refl Between Thmin & STh/L=          | 0.600                       | 289     | Report |
| PLAT934_ALERT_3_C | Number of (Iobs-Icalc)/SigmaW > 10 Outliers .... |                             | 1       | Check  |
| PLAT971_ALERT_2_C | Check Calcd Resid. Dens. 1.35A                   | From O12                    | 2.46    | eA-3   |
| PLAT971_ALERT_2_C | Check Calcd Resid. Dens. 2.08A                   | From F36                    | 2.25    | eA-3   |
| PLAT971_ALERT_2_C | Check Calcd Resid. Dens. 1.11A                   | From C63                    | 2.18    | eA-3   |
| PLAT971_ALERT_2_C | Check Calcd Resid. Dens. 1.44A                   | From C59                    | 2.07    | eA-3   |
| PLAT971_ALERT_2_C | Check Calcd Resid. Dens. 1.09A                   | From O9                     | 1.95    | eA-3   |
| PLAT971_ALERT_2_C | Check Calcd Resid. Dens. 0.95A                   | From F17                    | 1.92    | eA-3   |
| PLAT971_ALERT_2_C | Check Calcd Resid. Dens. 1.04A                   | From C51                    | 1.89    | eA-3   |
| PLAT971_ALERT_2_C | Check Calcd Resid. Dens. 0.76A                   | From Dy2                    | 1.84    | eA-3   |
| PLAT971_ALERT_2_C | Check Calcd Resid. Dens. 0.85A                   | From C58                    | 1.79    | eA-3   |
| PLAT971_ALERT_2_C | Check Calcd Resid. Dens. 2.03A                   | From C51                    | 1.75    | eA-3   |
| PLAT971_ALERT_2_C | Check Calcd Resid. Dens. 0.84A                   | From Dy2                    | 1.53    | eA-3   |
| PLAT972_ALERT_2_C | Check Calcd Resid. Dens. 0.70A                   | From Dy1                    | -2.15   | eA-3   |
| PLAT972_ALERT_2_C | Check Calcd Resid. Dens. 0.85A                   | From Dy2                    | -1.93   | eA-3   |
| PLAT972_ALERT_2_C | Check Calcd Resid. Dens. 0.53A                   | From F17                    | -1.73   | eA-3   |
| PLAT972_ALERT_2_C | Check Calcd Resid. Dens. 0.76A                   | From Dy2                    | -1.58   | eA-3   |
| PLAT972_ALERT_2_C | Check Calcd Resid. Dens. 0.73A                   | From C49                    | -1.51   | eA-3   |
| PLAT973_ALERT_2_C | Check Calcd Positive Resid. Density on           | Dy1                         | 1.37    | eA-3   |
| PLAT973_ALERT_2_C | Check Calcd Positive Resid. Density on           | Dy2                         | 1.34    | eA-3   |
| PLAT978_ALERT_2_C | Number C-C Bonds with Positive Residual Density. |                             | 0       | Info   |

---

● **Alert level G**

|                   |                                                  |                 |       |        |
|-------------------|--------------------------------------------------|-----------------|-------|--------|
| PLAT083_ALERT_2_G | SHELXL Second Parameter in WGHT                  | Unusually Large | 45.17 | Why ?  |
| PLAT154_ALERT_1_G | The s.u.'s on the Cell Angles are Equal ..(Note) |                 | 0.005 | Degree |
| PLAT171_ALERT_4_G | The CIF-Embedded .res File Contains EADP Records |                 | 2     | Report |
| PLAT242_ALERT_2_G | Low 'MainMol' Ueq as Compared to Neighbors of    |                 | C35   | Check  |
| PLAT242_ALERT_2_G | Low 'MainMol' Ueq as Compared to Neighbors of    |                 | C39   | Check  |
| PLAT242_ALERT_2_G | Low 'MainMol' Ueq as Compared to Neighbors of    |                 | C40   | Check  |
| PLAT242_ALERT_2_G | Low 'MainMol' Ueq as Compared to Neighbors of    |                 | C44   | Check  |
| PLAT242_ALERT_2_G | Low 'MainMol' Ueq as Compared to Neighbors of    |                 | C45   | Check  |
| PLAT242_ALERT_2_G | Low 'MainMol' Ueq as Compared to Neighbors of    |                 | C49   | Check  |
| PLAT242_ALERT_2_G | Low 'MainMol' Ueq as Compared to Neighbors of    |                 | C50   | Check  |
| PLAT242_ALERT_2_G | Low 'MainMol' Ueq as Compared to Neighbors of    |                 | C54   | Check  |
| PLAT242_ALERT_2_G | Low 'MainMol' Ueq as Compared to Neighbors of    |                 | C55   | Check  |
| PLAT242_ALERT_2_G | Low 'MainMol' Ueq as Compared to Neighbors of    |                 | C59   | Check  |
| PLAT242_ALERT_2_G | Low 'MainMol' Ueq as Compared to Neighbors of    |                 | C60   | Check  |
| PLAT242_ALERT_2_G | Low 'MainMol' Ueq as Compared to Neighbors of    |                 | C64   | Check  |
| PLAT434_ALERT_2_G | Short Inter HL..HL Contact F3                    | ..F13           | 2.81  | Ang.   |
| PLAT434_ALERT_2_G | Short Inter HL..HL Contact F6                    | ..F29           | 2.82  | Ang.   |
| PLAT794_ALERT_5_G | Tentative Bond Valency for Dy1                   | (II)            | 1.87  | Info   |
| PLAT794_ALERT_5_G | Tentative Bond Valency for Dy2                   | (II)            | 1.89  | Info   |
| PLAT912_ALERT_4_G | Missing # of FCF Reflections Above STh/L=        | 0.600           | 148   | Note   |

---

0 **ALERT level A** = Most likely a serious problem - resolve or explain  
16 **ALERT level B** = A potentially serious problem, consider carefully  
41 **ALERT level C** = Check. Ensure it is not caused by an omission or oversight  
20 **ALERT level G** = General information/check it is not something unexpected

1 ALERT type 1 CIF construction/syntax error, inconsistent or missing data  
57 ALERT type 2 Indicator that the structure model may be wrong or deficient  
6 ALERT type 3 Indicator that the structure quality may be low  
11 ALERT type 4 Improvement, methodology, query or suggestion  
2 ALERT type 5 Informative message, check

---

---

It is advisable to attempt to resolve as many as possible of the alerts in all categories. Often the minor alerts point to easily fixed oversights, errors and omissions in your CIF or refinement strategy, so attention to these fine details can be worthwhile. In order to resolve some of the more serious problems it may be necessary to carry out additional measurements or structure refinements. However, the purpose of your study may justify the reported deviations and the more serious of these should normally be commented upon in the discussion or experimental section of a paper or in the "special\_details" fields of the CIF. checkCIF was carefully designed to identify outliers and unusual parameters, but every test has its limitations and alerts that are not important in a particular case may appear. Conversely, the absence of alerts does not guarantee there are no aspects of the results needing attention. It is up to the individual to critically assess their own results and, if necessary, seek expert advice.

### **Publication of your CIF in IUCr journals**

A basic structural check has been run on your CIF. These basic checks will be run on all CIFs submitted for publication in IUCr journals (*Acta Crystallographica*, *Journal of Applied Crystallography*, *Journal of Synchrotron Radiation*); however, if you intend to submit to *Acta Crystallographica Section C* or *E* or *IUCrData*, you should make sure that full publication checks are run on the final version of your CIF prior to submission.

### **Publication of your CIF in other journals**

Please refer to the *Notes for Authors* of the relevant journal for any special instructions relating to CIF submission.

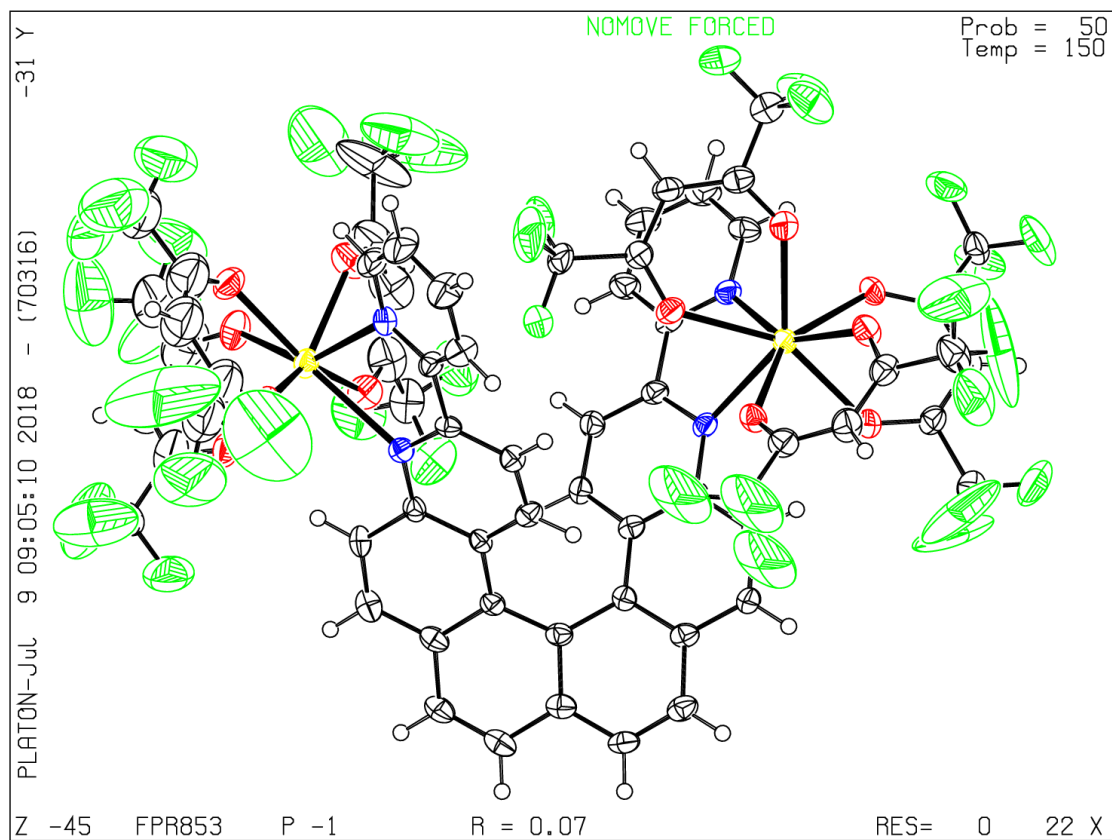

Supplement: s1 [file s1]
