# Supplementary material
Source: MDPI journal article supplement (https://www.mdpi.com/2312-7481/4/3/39)
Supplement: s1 [file s1]

## Supplementary Materials

### Slow Relaxation of the Magnetization in Bis-Decorated Chiral Helicene-Based Coordination Complexes of Lanthanides

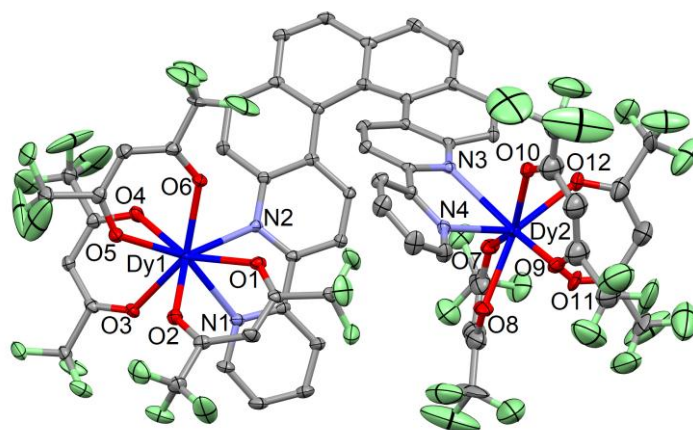

**Figure S1.** ORTEP view of 1. Thermal ellipsoids are drawn at 30% probability. Hydrogen atoms and solvent molecules of crystallization are omitted for clarity.

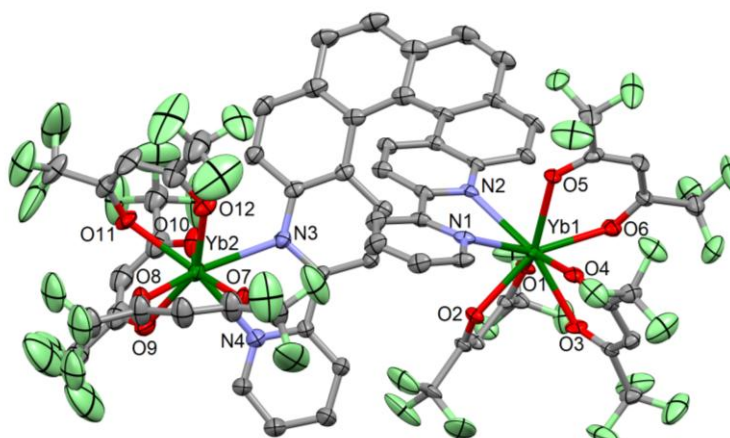

**Figure S2.** ORTEP view of 2. Thermal ellipsoids are drawn at 30% probability. Hydrogen atoms and solvent molecules of crystallization are omitted for clarity.

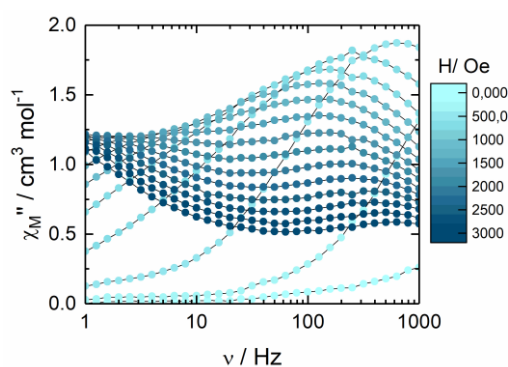

**Figure S3.** Field dependence of the out-of-phase component of the magnetic susceptibility for 1 at 2 K.

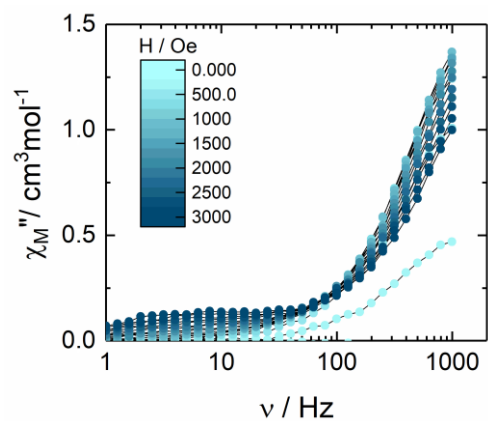

**Figure S4.** Field dependence of the out-of-phase component of the magnetic susceptibility for **2** at 2 K.

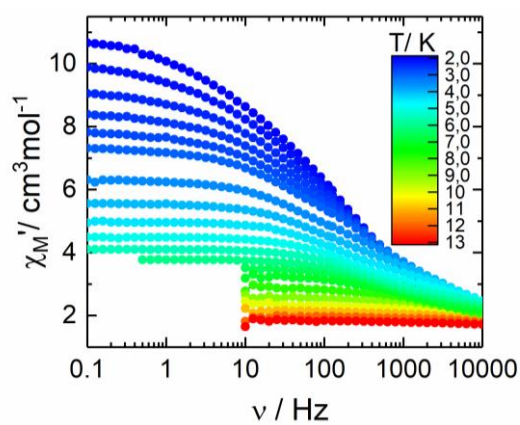

**Figure S5.** Frequency dependence of the in-phase component of the magnetic susceptibility for **1**.

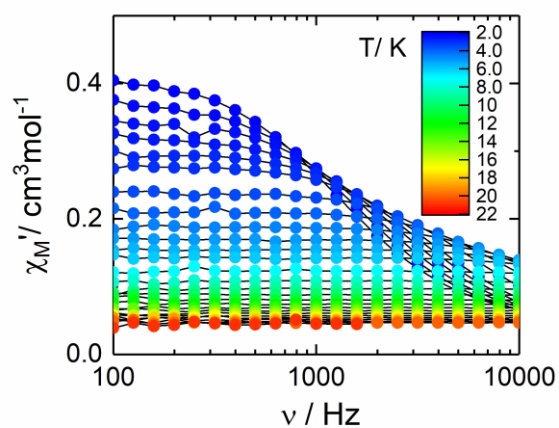

**Figure S6.** Frequency dependence of the in-phase component of the magnetic susceptibility for **2**.

**Extended Debye model.**

$$\chi_M' = \chi_s + (\chi_T - \chi_s) \frac{1 + (\omega\tau)^{1-\alpha} \sin\left(\alpha \frac{\pi}{2}\right)}{1 + 2(\omega\tau)^{1-\alpha} \sin\left(\alpha \frac{\pi}{2}\right) + (\omega\tau)^{2-2\alpha}}$$

$$\chi_M'' = (\chi_T - \chi_s) \frac{(\omega\tau)^{1-\alpha} \cos\left(\alpha \frac{\pi}{2}\right)}{1 + 2(\omega\tau)^{1-\alpha} \sin\left(\alpha \frac{\pi}{2}\right) + (\omega\tau)^{2-2\alpha}}$$

With  $\chi_T$  the isothermal susceptibility,  $\chi_s$  the adiabatic susceptibility,  $\tau$  the relaxation time and  $\alpha$  an empiric parameter which describe the distribution of the relaxation time. For SMM with only one relaxing object  $\alpha$  is close to zero. The extended Debye model was applied to fit simultaneously the experimental variations of  $\chi_M'$  and  $\chi_M''$  with the frequency  $f$  of the oscillating field ( $\omega = 2\pi f$ ). Typically, only the temperatures for which a maximum on the  $\chi''$  vs.  $f$  curves, have been considered. The best fitted parameters  $\tau$ ,  $\alpha$ ,  $\chi_T$ ,  $\chi_s$  are listed in Table S3 and S4 with the coefficient of determination  $R^2$ .

**Table S1.** X-ray crystallographic data of **1** and **2**.

| Compounds                                                   | <b>1</b>                                                                                   | <b>2</b>                                                                                   |
|-------------------------------------------------------------|--------------------------------------------------------------------------------------------|--------------------------------------------------------------------------------------------|
| Formula                                                     | <b>C<sub>64</sub>H<sub>26</sub>Dy<sub>2</sub>F<sub>36</sub>N<sub>4</sub>O<sub>12</sub></b> | <b>C<sub>70</sub>H<sub>40</sub>Yb<sub>2</sub>F<sub>36</sub>N<sub>4</sub>O<sub>12</sub></b> |
| M / g.mol <sup>-1</sup>                                     | <b>2051.89</b>                                                                             | <b>2159.14</b>                                                                             |
| Crystal system                                              | <b>Triclinic</b>                                                                           | <b>Triclinic</b>                                                                           |
| Space group                                                 | <b>P-1 (N°2)</b>                                                                           | <b>P-1 (N°2)</b>                                                                           |
| Cell parameters                                             | a = 12.2629(16) Å                                                                          | a = 12.2906(17) Å                                                                          |
|                                                             | b = 16.534(2) Å                                                                            | b = 17.962(3) Å                                                                            |
|                                                             | c = 18.118(3) Å                                                                            | c = 18.439(3) Å                                                                            |
|                                                             | $\alpha = 79.414(5)^\circ$                                                                 | $\alpha = 90.015(5)^\circ$                                                                 |
|                                                             | $\beta = 77.667(5)^\circ$                                                                  | $\beta = 99.337(5)^\circ$                                                                  |
|                                                             | $\gamma = 87.190(5)^\circ$                                                                 | $\gamma = 100.196(5)^\circ$                                                                |
| Volume/Å <sup>3</sup>                                       | 3527.4(8)                                                                                  | 3951.7(10)                                                                                 |
| Z                                                           | 2                                                                                          | 2                                                                                          |
| T/K                                                         | 150 (2)                                                                                    | 150 (2)                                                                                    |
| 2 $\theta$ range /°                                         | 4.24 ≤ 2 $\theta$ ≤ 55.20                                                                  | 5.85 ≤ 2 $\theta$ ≤ 54.97                                                                  |
| $\rho_{\text{calc}}$ / g.cm <sup>-3</sup>                   | 1.932                                                                                      | 1.815                                                                                      |
| $\mu$ / mm <sup>-1</sup>                                    | 2.261                                                                                      | 2.498                                                                                      |
| Number of reflections                                       | 75302                                                                                      | 136147                                                                                     |
| Independent reflections                                     | 15733                                                                                      | 17903                                                                                      |
| Fo <sup>2</sup> > 2 $\sigma$ (Fo) <sup>2</sup>              | 11594                                                                                      | 14464                                                                                      |
| Number of variables                                         | 1027                                                                                       | 1025                                                                                       |
| R <sub>int</sub> , R <sub>1</sub> , $\omega$ R <sub>2</sub> | 0.0758, 0.0672, 0.1585                                                                     | 0.0489, 0.1070, 0.2547                                                                     |

**Table S2.** SHAPE analysis for **1** and **2**.

|   | CShM <sub>SAPR-8</sub><br>(square antiprism) | CShM <sub>BTPR-8</sub><br>(biaugmented trigonal prism) | CShM <sub>TDD-8</sub><br>(triangular dodecahedron) |       |
|---|----------------------------------------------|--------------------------------------------------------|----------------------------------------------------|-------|
|   | D <sub>4d</sub>                              | C <sub>2v</sub>                                        | D <sub>2d</sub>                                    |       |
|   | Dy1                                          | 0.589                                                  | 2.616                                              | 2.626 |
| 1 | Dy2                                          | 1.704                                                  | 1.480                                              | 1.677 |
|   | Yb1                                          | 1.632                                                  | 1.671                                              | 0.600 |
| 2 | Yb2                                          | 1.268                                                  | 2.612                                              | 1.165 |

**Table S3.** Best-fitted parameters ( $\chi_T$ ,  $\chi_S$ ,  $\tau$  and  $\alpha$ ) with the extended Debye model 2 at 1000 Oe field in the temperature range 2.0-4 K.

| T/K | $\chi_T/\text{cm}^3 \text{ mol}^{-1}$ | $\chi_S/\text{cm}^3 \text{ mol}^{-1}$ | $\alpha$ | $\tau/\text{s}$ | $R^2$   |
|-----|---------------------------------------|---------------------------------------|----------|-----------------|---------|
| 2   | 0,41509                               | 0,04357                               | 0,12382  | 1,19997E-4      | 0,99975 |
| 2.2 | 0,37815                               | 0,04077                               | 0,11062  | 9,3418E-5       | 0,9996  |
| 2.4 | 0,34762                               | 0,03734                               | 0,10312  | 7,35554E-5      | 0,99897 |
| 2.6 | 0,32366                               | 0,03498                               | 0,10083  | 5,89835E-5      | 0,99934 |
| 2.8 | 0,29902                               | 0,03472                               | 0,08331  | 4,7948E-5       | 0,99948 |
| 3   | 0,28054                               | 0,03121                               | 0,08488  | 3,93158E-5      | 0,99954 |
| 3.5 | 0,23989                               | 0,03147                               | 0,05495  | 2,51774E-5      | 0,99925 |
| 4   | 0,21184                               | 0,02786                               | 0,05772  | 1,65059E-5      | 0,99941 |

**Table S4.** Computed energy levels (the ground state is set at zero), component values of the Lande factor  $g$  and wavefunction composition for each MJ state of the ground-state multiplet for Dy1 of 1.

| KD | Energy (cm <sup>-1</sup> ) | $g_x$ | $g_y$ | $g_z$ | Wavefunction composition *                                                                                           |
|----|----------------------------|-------|-------|-------|----------------------------------------------------------------------------------------------------------------------|
| 1  | 0.0                        | 1.34  | 2.01  | 14.94 | 0.30 $ \pm 13/2\rangle + 0.27  \pm 11/2\rangle + 0.23  \pm 15/2\rangle + 0.11  \pm 7/2\rangle$                       |
| 2  | 55.9                       | 4.98  | 6.34  | 9.80  | 0.22 $ \pm 5/2\rangle + 0.19  \pm 11/2\rangle + 0.16  \pm 3/2\rangle + 0.13  \pm 13/2\rangle + 0.12  \pm 9/2\rangle$ |
| 3  | 143.9                      | 4.20  | 5.04  | 9.49  | 0.29 $ \pm 13/2\rangle + 0.27  \pm 9/2\rangle + 0.10  \pm 3/2\rangle + 0.10  \pm 1/2\rangle$                         |
| 4  | 297.4                      | 4.00  | 5.62  | 8.84  | 0.25 $ \pm 15/2\rangle + 0.20  \pm 1/2\rangle + 0.16  \pm 9/2\rangle + 0.14  \pm 13/2\rangle + 0.11  \pm 7/2\rangle$ |
| 5  | 383.5                      | 1.39  | 3.91  | 13.17 | 0.30 $ \pm 7/2\rangle + 0.18  \pm 5/2\rangle + 0.13  \pm 11/2\rangle + 0.11  \pm 3/2\rangle + 0.10  \pm 1/2\rangle$  |
| 6  | 412.3                      | 0.60  | 3.58  | 12.30 | 0.28 $ \pm 1/2\rangle + 0.16  \pm 9/2\rangle + 0.13  \pm 15/2\rangle + 0.13  \pm 11/2\rangle + 0.12  \pm 5/2\rangle$ |
| 7  | 510.8                      | 0.80  | 3.37  | 12.45 | 0.25 $ \pm 3/2\rangle + 0.23  \pm 15/2\rangle + 0.16  \pm 11/2\rangle + 0.14  \pm 9/2\rangle$                        |
| 8  | 662.7                      | 0.80  | 0.75  | 17.87 | 0.35 $ \pm 5/2\rangle + 0.22  \pm 7/2\rangle + 0.19  \pm 3/2\rangle + 0.11  \pm 1/2\rangle$                          |

\* Only the contributions  $\geq 10\%$  are given.

**Table S5.** Computed energy levels (the ground state is set at zero), component values of the Lande factor  $g$  and wavefunction composition for each MJ state of the ground-state multiplet for Dy2 of 1.

| KD | Energy (cm <sup>-1</sup> ) | $g_x$ | $g_y$ | $g_z$ | Wavefunction composition *                                                                                           |
|----|----------------------------|-------|-------|-------|----------------------------------------------------------------------------------------------------------------------|
| 1  | 0.0                        | 0.17  | 0.33  | 18.97 | 0.86 $ \pm 15/2\rangle + 0.11  \pm 11/2\rangle$                                                                      |
| 2  | 96.0                       | 0.83  | 1.45  | 15.46 | 0.54 $ \pm 13/2\rangle + 0.29  \pm 9/2\rangle$                                                                       |
| 3  | 164.0                      | 0.82  | 2.60  | 13.48 | 0.32 $ \pm 7/2\rangle + 0.30  \pm 11/2\rangle + 0.14  \pm 5/2\rangle$                                                |
| 4  | 204.6                      | 0.08  | 0.74  | 17.35 | 0.21 $ \pm 11/2\rangle + 0.20  \pm 1/2\rangle + 0.14  \pm 5/2\rangle + 0.14  \pm 3/2\rangle + 0.13  \pm 13/2\rangle$ |
| 5  | 230.9                      | 8.95  | 6.55  | 3.19  | 0.23 $ \pm 9/2\rangle + 0.21  \pm 13/2\rangle + 0.20  \pm 5/2\rangle + 0.12  \pm 3/2\rangle$                         |
| 6  | 273.5                      | 2.48  | 3.22  | 13.56 | 0.25 $ \pm 1/2\rangle + 0.23  \pm 3/2\rangle + 0.17  \pm 7/2\rangle + 0.12  \pm 11/2\rangle + 0.10  \pm 9/2\rangle$  |
| 7  | 327.2                      | 0.32  | 0.63  | 18.43 | 0.27 $ \pm 5/2\rangle + 0.21  \pm 7/2\rangle + 0.17  \pm 9/2\rangle + 0.15  \pm 3/2\rangle + 0.11  \pm 11/2\rangle$  |
| 8  | 652.7                      | 0.01  | 0.01  | 19.76 | 0.43 $ \pm 1/2\rangle + 0.31  \pm 3/2\rangle + 0.16  \pm 5/2\rangle$                                                 |

\* Only the contributions  $\geq 10\%$  are given.
